# Supplementary material
Source: Springer Nature journal article supplement (https://www.springermedizin.de/resource/supplementary/13045_2010_125_MOESM1_ESM.pdf/9660712)

# KAPLAN & MEIER SURVIVAL CURVE

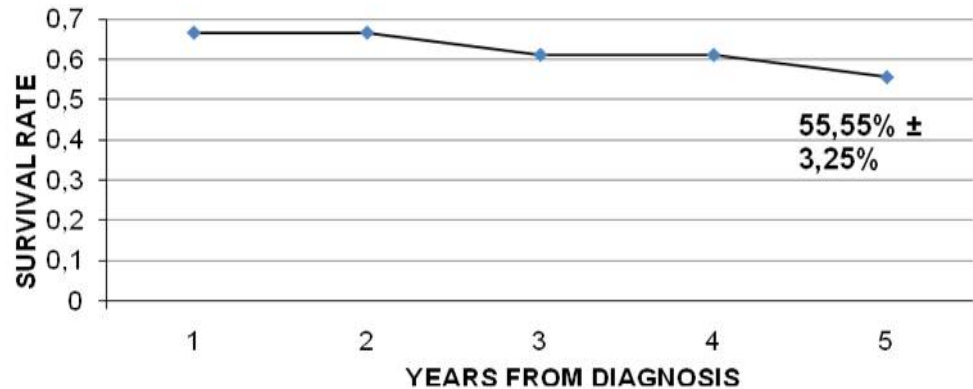

Supplement: MOESM1 [file 9660712]
